# Supplementary material for: A Problem-Sorting Task Detects Changes in Undergraduate Biological Expertise over a Single Semester
Source: Atypon-hosted journal article supplement (doi:10.1187/cbe.16-05-0175), 2017-04-14
Supplement: combinedsupmats.pdf [file combinedsupmats.pdf]

# Supplemental Material

*CBE—Life Sciences Education*

Hoskinson *et al.*

716 Table S1. Cluster centers from cluster analysis characterized by the given pairs. Not all problem pairs  
717 helped to characterize the two distinct clusters.

718

719 Table S2. Mean edit distance data across all sections, with SEM in parentheses. Normalized  $ED_{\text{deep}}$   
720 was calculated by scaling  $ED_{\text{deep}}$  to the possible changes in  $ED_{\text{deep}}$  (see Metrics).

721

722 Figure S1. Investigational setup for each of the three semesters (left) in which data were collected,  
723 arranged by course topic (columns), course sequence (1<sup>st</sup> or 2<sup>nd</sup>; rows), and sort type (F=framed,  
724 U=unframed). Numerals in the cells correspond to the fifteen participating courses. See Tables 1, 2,  
725 and S2 for descriptive statistics from each course.

|                |                 | Topic      |     |         |     |
|----------------|-----------------|------------|-----|---------|-----|
|                |                 | Cell/molec |     | Org/pop |     |
| Spring<br>2014 | 1 <sup>st</sup> | 1F         | 1U  | 4F      | 4U  |
|                | 2 <sup>nd</sup> | 2F         | 2U  | 7F      | 8F  |
| Fall<br>2014   | 1 <sup>st</sup> | 3F         |     | 5F      | 5U  |
|                | 2 <sup>nd</sup> | 13U        |     | 6F      | 14U |
| Spring<br>2015 | 1 <sup>st</sup> | 10U        | 11U | 12U     |     |
|                | 2 <sup>nd</sup> |            |     | 9F      | 15U |

Sequence

Figure S1

| Cluster Center | Superficial Pairs                                                                  | Deep Pairs                         | Unexpected Pairs |
|----------------|------------------------------------------------------------------------------------|------------------------------------|------------------|
| 1              |                                                                                    | AD, BE, BJ, BO, EJ, JO, IM, IP, CF |                  |
| 2              | DI, DJ, DK, IJ, IK, JK, BF, BH, BM, FH, FM, HM, LN, LO, LP, NO, NP, OP, AE, AG, CG |                                    |                  |

Table S1.

| Course | N  | Semester | Sort Type | Sequence | Topic      | Mean Edit Distance to Deep (pre) | Mean Edit Distance to Deep (post) | Mean Change in Edit Distance to Deep | Mean Change in Normalized Edit Distance to Deep |
|--------|----|----------|-----------|----------|------------|----------------------------------|-----------------------------------|--------------------------------------|-------------------------------------------------|
| 1F     | 29 | 1        | F         | 1st      | Cell-Molec | 4.3 (0.5)                        | 4.9 (0.4)                         | 0.7 (0.4)                            | -4.6 (5)                                        |
| 2F     | 47 | 1        | F         | 1st      | Cell-Molec | 4.7 (0.4)                        | 4.0 (0.4)                         | -0.6 (0.3)                           | 19 (6)                                          |
| 3      | 76 | 2        | F         | 1st      | Cell-Molec | 5.3 (0.3)                        | 5.0 (0.3)                         | -0.3 (0.3)                           | 10 (4)                                          |
| 4F     | 22 | 1        | F         | 1st      | Org-Pop    | 4.9 (0.6)                        | 3.2 (0.6)                         | -1.6 (0.5)                           | 33 (9)                                          |
| 5F     | 39 | 2        | F         | 1st      | Org-Pop    | 3.4 (0.4)                        | 3.4 (0.3)                         | 0.0 (0.3)                            | 7.8 (5.1)                                       |
| 6      | 68 | 2        | F         | 1st      | Org-Pop    | 4.5 (0.3)                        | 4.5 (0.2)                         | 2.1 (0.3)                            | 3.5 (2.1)                                       |
| 7F     | 17 | 1        | F         | 2nd      | Org-Pop    | 4.5 (0.5)                        | 2.9 (0.5)                         | -1.6 (0.6)                           | 41 (11)                                         |
| 8F     | 44 | 1        | F         | 2nd      | Org-Pop    | 4.3 (0.4)                        | 2.7 (0.4)                         | -1.7 (0.2)                           | 40 (5)                                          |
| 9      | 70 | 3        | F         | 2nd      | Org-Pop    | 4.4 (0.3)                        | 2.7 (0.3)                         | -1.7 (0.3)                           | 36 (4.8)                                        |
| 1U     | 17 | 1        | U         | 1st      | Cell-Molec | 8.5 (0.7)                        | 8.6 (0.6)                         | 0.1 (0.6)                            | -13 (10)                                        |
| 2U     | 22 | 1        | U         | 1st      | Cell-Molec | 7.9 (0.7)                        | 6.6 (0.6)                         | -1.3 (0.4)                           | 17 (7)                                          |
| 10     | 39 | 3        | U         | 1st      | Cell-Molec | 8.4 (0.5)                        | 8.2 (0.5)                         | -0.2 (0.4)                           | -14 (7)                                         |
| 11     | 57 | 3        | U         | 1st      | Cell-Molec | 7.6 (0.4)                        | 7.5 (0.4)                         | -0.1 (0.3)                           | -6.0 (5.8)                                      |
| 4U     | 10 | 1        | U         | 1st      | Org-Pop    | 6.6 (0.8)                        | 5.1 (0.7)                         | -1.5 (1.2)                           | 17 (12)                                         |
| 5U     | 27 | 2        | U         | 1st      | Org-Pop    | 8.1 (0.6)                        | 8.1 (0.6)                         | 0.0 (0.4)                            | -9.5 (6.8)                                      |
| 12     | 39 | 3        | U         | 1st      | Org-Pop    | 8.4 (0.4)                        | 7.0 (0.5)                         | -1.3 (0.4)                           | 6.9 (6.6)                                       |
| 13     | 16 | 2        | U         | 2nd      | Cell-Molec | 6.5 (0.8)                        | 4.8 (0.4)                         | -1.7 (0.8)                           | 21 (8)                                          |
| 8U     | 25 | 1        | U         | 2nd      | Org-Pop    | 7.7 (0.5)                        | 6.4 (0.6)                         | -1.2 (0.6)                           | 11 (8)                                          |
| 14     | 67 | 2        | U         | 2nd      | Org-Pop    | 7.4 (0.4)                        | 6.5 (0.4)                         | -1.0 (0.4)                           | 6.7 (5.1)                                       |
| 15     | 20 | 3        | U         | 2nd      | Org-Pop    | 8.3 (0.6)                        | 6.3 (0.5)                         | -2.0 (0.6)                           | 19 (8)                                          |

Table S2: Mean edit distance data across all sections, with SEM in parentheses. Normalized  $\Delta ED_{\text{deep}}$  was calculated by scaling  $\Delta ED_{\text{deep}}$  to the possible changes in  $ED_{\text{deep}}$ .
